# Supplementary material for: Intratumoral diversity of telomere length in individual neuroblastoma tumors
Source: PubMed Central journal article supplement (PMC4480695; doi:10.18632/oncotarget.2115), 2014-06-18
Supplement: oncotarget-06-7493-s001.pdf [file oncotarget-06-7493-s001.pdf]

## Intratumoral diversity of telomere length in individual Neuroblastoma tumors

### Supplementary Material

#### Demographic and clinical characteristics of NB patients (N=102) and type of TL (heterogeneous/homogeneous)

|                           | TL:<br>“heterogeneous” | TL:<br>“homogeneous” | P                  |
|---------------------------|------------------------|----------------------|--------------------|
| <b>Age:</b>               |                        |                      |                    |
| ≥ 18 months               | 13/44 (29.6%)          | 31/44 (70.4%)        | 0.73               |
| < 18 months               | 19/58 (32.8%)          | 39/58 (67.2%)        |                    |
| <b>Stage:</b>             |                        |                      |                    |
| 1                         | 6/13 (46.2%)           | 7/13 (53.8%)         | 0.054 <sup>§</sup> |
| 2A/2B                     | 13/18 (72.2%)          | 5/18 (27.8%)         |                    |
| 3                         | 16/28 (57.1%)          | 12/28 (42.9%)        |                    |
| 4                         | 27/31 (87.1%)          | 4/31 (12.9%)         |                    |
| 4s                        | 7/12 (58.3%)           | 5/12 (41.7%)         |                    |
| <b>MYCN status:</b>       |                        |                      |                    |
| Amplified                 | 15/44 (34.1%)          | 29/44 (65.9%)        | 0.61               |
| Not amplified             | 17/58 (29.3%)          | 41/58 (70.7%)        |                    |
| <b>Ploidy:</b>            |                        |                      |                    |
| Diploid                   | 16/49 (32.6%)          | 33/49 (67.4%)        | 0.79               |
| Hyperdiploid              | 16/53 (30.2%)          | 37/53 (69.8%)        |                    |
| <b>Histology:</b>         |                        |                      |                    |
| Unfavorable histology     | 16/50 (32.0%)          | 34/50 (68.0%)        | 0.89               |
| Favorable histology       | 16/52 (30.8%)          | 36/52 (69.2%)        |                    |
| <b>Risk Group (N=86):</b> |                        |                      |                    |
| High/Intermediate         | 18/58 (31.0%)          | 40/58 (69.0%)        | 0.92               |
| Low                       | 9/28 (32.1%)           | 19/28 (67.9%)        |                    |

P values refer to the Pearson’s Chi-square test unless otherwise specified; <sup>§</sup> Fisher’s Exact test.
